# Supplementary material for: The AM-4 Family of Layered Titanosilicates: Single-Crystal-to-Single-Crystal Transformation, Synthesis and Ionic Conductivity
Source: MDPI journal article supplement (doi:10.3390/ma17010111), 2023-12-25
Supplement: s1 [file s1]

# Supplementary Materials: Properties of compounds AM-4 family: single to single crystal transformation, synthesis, ion-conductivity

Galina O. Kalashnikova <sup>1</sup>, Sergey V. Krivovichev <sup>1,2</sup>, Victor N. Yakovenchuk <sup>1,3</sup>, Ekaterina A. Selivanova <sup>1,3</sup>, Margarita S. Avdontseva <sup>2</sup>, Gregory Yu. Ivanyuk <sup>1</sup>, Yakov A. Pakhomovsky <sup>1,3</sup>, Darya V. Gryaznova <sup>1</sup>, Natalya A. Kabanova <sup>4,5</sup>, Yelizaveta A. Morkhova <sup>5,6</sup>, Olga Yu. Sinel'shikova <sup>7</sup>, Vladimir N. Bocharov <sup>8</sup>, Anatoly N. Nikolaev <sup>1,9</sup>, Olga F. Goychuk <sup>1,4</sup> and Taras L. Panikorovskii <sup>4</sup>

## 1. X-Ray Supplementary Data

**Table S1.** Fractional atomic coordinates and equivalent isotropic displacement parameters ( $\text{\AA}^2$ ) for lintisite sample.

| Site | occupancy | $x/a$         | $y/b$       | $z/c$         | $U^{\text{ani}}$ |
|------|-----------|---------------|-------------|---------------|------------------|
| Ti1  | Ti        | 0.33495(2)    | 0.09521(4)  | 0.37533(6)    | 0.00623(10)      |
| Si2  | Si        | 0.26371(2)    | 0.40758(6)  | 0.29046(10)   | 0.00678(12)      |
| Si1  | Si        | 0.40747(2)    | 0.40135(6)  | 0.46088(10)   | 0.00806(12)      |
| Na1  | Na        | 0.33483(3)    | 0.31265(10) | 0.88442(16)   | 0.01664(19)      |
| Na2  | Na        | $\frac{1}{2}$ | 0.15123(18) | $\frac{1}{4}$ | 0.0271(3)        |
| O6   | O         | 0.20710(5)    | 0.41625(15) | 0.2879(3)     | 0.0083(3)        |
| O7   | O         | 0.36388(5)    | 0.07017(15) | 0.0716(3)     | 0.0095(3)        |
| O5   | O         | 0.28632(5)    | 0.23888(15) | 0.2577(3)     | 0.0104(3)        |
| O4   | O         | 0.28461(4)    | 0.48802(16) | 0.5531(2)     | 0.0093(3)        |
| O3   | O         | 0.37494(5)    | 0.24912(16) | 0.5101(3)     | 0.0112(3)        |
| O2   | O         | 0.38970(5)    | 0.47326(17) | 0.1815(3)     | 0.0124(3)        |
| O1   | O         | 0.46223(5)    | 0.37352(18) | 0.4809(3)     | 0.0136(3)        |
| O8   | O         | 0.45502(7)    | 0.1035(2)   | -0.1166(4)    | 0.0290(4)        |
| Li1  | Li        | $\frac{1}{2}$ | 0.5111(7)   | $\frac{1}{4}$ | 0.0179(10)       |
| H8A  | H         | 0.4265(15)    | 0.097(4)    | -0.075(8)     | 0.049(11)        |
| H8B  | H         | 0.4552(14)    | 0.171(5)    | -0.239(9)     | 0.054(11)        |

**Table S2.** Fractional atomic coordinates and equivalent isotropic displacement parameters ( $\text{\AA}^2$ ) for kukisvumite sample.

| Site | occupancy          | $x/a$         | $y/b$         | $z/c$       | $U^{\text{ani}}$ |
|------|--------------------|---------------|---------------|-------------|------------------|
| Ti1  | Ti                 | 0.41640(2)    | 0.34498(5)    | 0.36755(9)  | 0.00612(12)      |
| Zn1  | Zn <sub>0.50</sub> | $\frac{1}{4}$ | $\frac{3}{4}$ | 0.2089(2)   | 0.0141(2)        |
| Si2  | Si                 | 0.34371(3)    | 0.64912(9)    | 0.44830(15) | 0.00743(16)      |
| Si1  | Si                 | 0.48623(3)    | 0.65771(8)    | 0.28857(15) | 0.00592(15)      |
| Na2  | Na                 | 0.41567(5)    | 0.56145(15)   | 0.8766(3)   | 0.0164(3)        |
| O8   | O                  | 0.38796(7)    | 0.3194(2)     | 0.0614(4)   | 0.0088(4)        |
| O1   | O                  | 0.54214(7)    | 0.6666(2)     | 0.2915(4)   | 0.0078(4)        |
| O3   | O                  | 0.46426(7)    | 0.4881(2)     | 0.2539(4)   | 0.0101(4)        |
| O4   | O                  | 0.37719(7)    | 0.5002(2)     | 0.4945(4)   | 0.0111(4)        |
| O2   | O                  | 0.46546(6)    | 0.7384(2)     | 0.5490(4)   | 0.0086(4)        |
| O6   | O                  | 0.35966(8)    | 0.7260(3)     | 0.1732(5)   | 0.0173(5)        |
| O5   | O                  | 0.29033(8)    | 0.6103(3)     | 0.4588(7)   | 0.0319(7)        |
| Na1  | Na <sub>0.50</sub> | 0.24970(13)   | 0.4092(5)     | 0.2112(7)   | 0.0304(11)       |
| O7B  | O <sub>0.50</sub>  | 0.20734(19)   | 0.3515(7)     | 0.5689(12)  | 0.0263(12)       |
| O7A  | O <sub>0.50</sub>  | 0.20313(19)   | 0.3530(7)     | 0.3697(12)  | 0.0275(12)       |

**Table S3.** Fractional atomic coordinates and equivalent isotropic displacement parameters ( $\text{\AA}^2$ ) for K3 sample.

| Site | occupancy | $x/a$      | $y/b$      | $z/c$       | $U^{\text{ani}}$ |
|------|-----------|------------|------------|-------------|------------------|
| Ti1  | Ti        | 0.5950(2)  | 0.6531(7)  | -0.0923(13) | 0.016(4)         |
| Ti2  | Ti        | 0.5949(3)  | -0.1286(7) | 0.4069(12)  | 0.016(4)         |
| Si2  | Si        | 0.5205(4)  | 0.1765(11) | 0.276(2)    | 0.016(4)         |
| Si1  | Si        | 0.5213(4)  | 0.3463(11) | -0.2263(18) | 0.014(4)         |
| Si4  | Si        | 0.6839(4)  | 0.3557(13) | 1.030(2)    | 0.021(4)         |
| Si3  | Si        | 0.6845(4)  | 0.1574(12) | 0.5453(18)  | 0.019(4)         |
| O4   | O         | 0.4492(10) | 0.201(3)   | 0.266(5)    | 0.023(7)         |
| O13  | O         | 0.6372(9)  | 0.697(3)   | -0.382(5)   | 0.020(5)         |
| O10  | O         | 0.7492(8)  | 0.414(3)   | 1.042(6)    | 0.020(5)         |
| O2   | O         | 0.4510(8)  | 0.330(2)   | -0.220(5)   | 0.011(6)         |
| O6   | O         | 0.5466(11) | 0.267(2)   | 0.522(5)    | 0.015(6)         |
| O1   | O         | 0.5422(9)  | 0.521(2)   | -0.211(5)   | 0.013(6)         |
| O9   | O         | 0.6447(16) | 0.503(5)   | 1.046(9)    | 0.063(11)        |
| O5   | O         | 0.5421(11) | 0.005(3)   | 0.275(6)    | 0.032(7)         |
| O7   | O         | 0.6435(9)  | 0.009(3)   | 0.511(5)    | 0.020(6)         |
| O3   | O         | 0.5450(13) | 0.259(3)   | 0.017(5)    | 0.024(7)         |
| O12  | O         | 0.6386(10) | -0.181(3)  | 0.078(6)    | 0.028(7)         |
| O11  | O         | 0.676(2)   | 0.263(5)   | 1.314(10)   | 0.079(15)        |
| O8   | O         | 0.6718(13) | 0.244(3)   | 0.805(6)    | 0.036(8)         |
| O14  | O         | 0.7521(14) | 0.097(4)   | 0.501(10)   | 0.061(12)        |

**Table S4.** Fractional atomic coordinates and equivalent isotropic displacement parameters ( $\text{\AA}^2$ ) for L3 sample.

| Site | occupancy | $x/a$      | $y/b$      | $z/c$      | $U^{\text{ani}}$ |
|------|-----------|------------|------------|------------|------------------|
| Ti1  | Ti        | 0.3101(2)  | 0.6407(2)  | 0.5104(5)  | 0.0197(11)       |
| Si2  | Si        | 0.4579(3)  | 0.3341(4)  | 0.7085(7)  | 0.0184(12)       |
| Si1  | Si        | 0.1314(4)  | 0.3508(4)  | 0.3001(8)  | 0.0250(13)       |
| O5   | O         | 0.5967(7)  | 0.3174(10) | 0.7657(16) | 0.0185(19)       |
| O4   | O         | 0.4179(8)  | 0.5097(9)  | 0.6826(17) | 0.022(2)         |
| O7   | O         | 0.2247(8)  | 0.6899(11) | 0.7863(18) | 0.025(2)         |
| O6   | O         | 0.4082(7)  | 0.2431(10) | 0.4434(16) | 0.020(2)         |
| O3   | O         | 0.2119(8)  | 0.4961(12) | 0.352(2)   | 0.032(2)         |
| O1   | O         | 0.0001(9)  | 0.4081(13) | 0.247(2)   | 0.041(3)         |
| O2   | O         | 0.1512(11) | 0.2632(15) | 0.048(2)   | 0.051(3)         |

**Table S5.** Selected interatomic distances for lintisite.

| Atom | Atom            | Length/ $\text{\AA}$ | Atom | Atom             | Length/ $\text{\AA}$ |
|------|-----------------|----------------------|------|------------------|----------------------|
| Ti1  | O6 <sup>4</sup> | 2.1438(14)           | Na1  | O5 <sup>9</sup>  | 2.4875(16)           |
| Ti1  | O6 <sup>5</sup> | 2.1190(13)           | Na1  | O4               | 2.6859(16)           |
| Ti1  | O7 <sup>1</sup> | 1.9274(14)           | Na1  | O4 <sup>7</sup>  | 2.4083(16)           |
| Ti1  | O7              | 1.8094(14)           | Na1  | O3               | 2.3418(16)           |
| Ti1  | O5              | 1.9479(14)           | Na1  | O2 <sup>7</sup>  | 2.6469(17)           |
| Ti1  | O3              | 1.8748(14)           | Na1  | O2 <sup>9</sup>  | 2.5816(17)           |
| Si1  | O3              | 1.6264(14)           | Na2  | O1               | 2.5094(19)           |
| Si1  | O2              | 1.6523(15)           | Na2  | O1 <sup>12</sup> | 2.5094(19)           |
| Si1  | O2 <sup>7</sup> | 1.6604(15)           | Na2  | O8 <sup>11</sup> | 2.636(2)             |
| Si1  | O1              | 1.5821(15)           | Na2  | O8 <sup>1</sup>  | 2.636(2)             |

| Atom | Atom            | Length/Å   | Atom             | Atom             | Length/Å |
|------|-----------------|------------|------------------|------------------|----------|
|      |                 |            | Na2              | O8               | 2.318(2) |
| Si2  | O6              | 1.6166(14) | Na2              | O8 <sup>12</sup> | 2.318(2) |
| Si2  | O5              | 1.5966(14) |                  |                  |          |
| Si2  | O4              | 1.6359(14) | Li1 <sup>8</sup> | O1               | 2.014(3) |
| Si2  | O4 <sup>6</sup> | 1.6469(14) | Li1              | O1               | 2.012(4) |
|      |                 |            | Li1 <sup>8</sup> | O1               | 2.014(3) |
| Na1  | O6 <sup>4</sup> | 2.4629(16) | Li1              | O1               | 2.012(4) |
| Na1  | O7 <sup>9</sup> | 2.4387(16) |                  |                  |          |

<sup>1</sup>+X,-Y,1/2+Z; <sup>2</sup>+X,-Y,-1/2+Z; <sup>3</sup>+X,+Y,-1+Z; <sup>4</sup>1/2-X,1/2-Y,1-Z; <sup>5</sup>1/2-X,-1/2+Y,1/2-Z; <sup>6</sup>+X,1-Y,-1/2+Z; <sup>7</sup>+X,1-Y,1/2+Z; <sup>8</sup>1-X,1-Y,1-Z; <sup>9</sup>+X,+Y,1+Z; <sup>10</sup>1-X,-Y,1-Z; <sup>11</sup>1-X,-Y,-Z; <sup>12</sup>1-X,+Y,1/2-Z; <sup>13</sup>1-X,1-Y,-Z.

**Table S6.** Selected interatomic distances for kukisvumite.

| Atom | Atom            | Length/Å | Atom              | Atom              | Length/Å |
|------|-----------------|----------|-------------------|-------------------|----------|
| Ti1  | O8 <sup>2</sup> | 1.920(2) | Na2               | O8 <sup>10</sup>  | 2.427(2) |
| Ti1  | O8              | 1.807(2) | Na2               | O1 <sup>4</sup>   | 2.468(2) |
| Ti1  | O1 <sup>4</sup> | 2.144(2) | Na2               | O3 <sup>10</sup>  | 2.496(2) |
| Ti1  | O1 <sup>5</sup> | 2.113(2) | Na2               | O4                | 2.340(3) |
| Ti1  | O3              | 1.943(2) | Na2               | O2                | 2.700(2) |
| Ti1  | O4              | 1.870(2) | Na2               | O2 <sup>7</sup>   | 2.414(2) |
|      |                 |          | Na2               | O6 <sup>7</sup>   | 2.659(3) |
| Zn1  | O5 <sup>6</sup> | 2.120(3) | Na2               | O6 <sup>10</sup>  | 2.646(3) |
| Zn1  | O5 <sup>8</sup> | 2.120(3) |                   |                   |          |
| Zn1  | O5              | 2.120(3) | Na1 <sup>11</sup> | O5                | 2.459(5) |
| Zn1  | O5 <sup>9</sup> | 2.120(3) | Na1               | O5                | 2.454(5) |
|      |                 |          | Na1               | O7B <sup>8</sup>  | 1.528(7) |
| Si1  | O1              | 1.617(2) | Na1               | O7B               | 2.284(7) |
| Si1  | O3              | 1.599(2) | Na1               | O7B <sup>1</sup>  | 2.657(7) |
| Si1  | O2              | 1.637(2) | Na1               | O7A <sup>12</sup> | 2.758(7) |
| Si1  | O2 <sup>6</sup> | 1.647(2) | Na1               | O7A <sup>8</sup>  | 2.292(7) |
|      |                 |          | Na1               | O7A               | 1.651(6) |
| Si2  | O4              | 1.622(2) |                   |                   |          |
| Si2  | O6              | 1.644(2) |                   |                   |          |
| Si2  | O6 <sup>7</sup> | 1.653(2) |                   |                   |          |
| Si2  | O5              | 1.579(3) |                   |                   |          |

<sup>1</sup>+X,1/2-Y,-1/2+Z; <sup>2</sup>+X,1/2-Y,1/2+Z; <sup>3</sup>+X,+Y,-1+Z; <sup>4</sup>1-X,1-Y,1-Z; <sup>5</sup>1-X,-1/2+Y,1/2-Z; <sup>6</sup>+X,3/2-Y,-1/2+Z; <sup>7</sup>+X,3/2-Y,1/2+Z; <sup>8</sup>1/2-X,+Y,-1/2+Z; <sup>9</sup>1/2-X,3/2-Y,+Z; <sup>10</sup>+X,+Y,1+Z; <sup>11</sup>1/2-X,+Y,1/2+Z; <sup>12</sup>1/2-X,1/2-Y,+Z.

**Table S7.** Selected interatomic distances for K3.

| Atom | Atom             | Length/Å | Atom | Atom | Length/Å |
|------|------------------|----------|------|------|----------|
| Ti1  | O4 <sup>3</sup>  | 2.03(3)  | Si1  | O3   | 1.58(3)  |
| Ti1  | O13              | 1.84(3)  |      |      |          |
| Ti1  | O2 <sup>4</sup>  | 2.12(2)  | Si2  | O4   | 1.68(2)  |
| Ti1  | O1               | 1.80(2)  | Si2  | O6   | 1.62(3)  |
| Ti1  | O9 <sup>5</sup>  | 1.90(4)  | Si2  | O5   | 1.58(3)  |
| Ti1  | O12 <sup>1</sup> | 1.98(3)  | Si2  | O3   | 1.63(3)  |

|     |                  |         |     |                  |         |
|-----|------------------|---------|-----|------------------|---------|
| Ti2 | O4 <sup>6</sup>  | 2.02(3) | Si3 | O7               | 1.62(2) |
| Ti2 | O13 <sup>7</sup> | 2.13(3) | Si3 | O11 <sup>5</sup> | 1.53(5) |
| Ti2 | O2 <sup>6</sup>  | 1.99(2) | Si3 | O8               | 1.58(3) |
| Ti2 | O5               | 1.83(3) | Si3 | O14              | 1.68(3) |
| Ti2 | O7               | 1.74(2) |     |                  |         |
| Ti2 | O12              | 2.05(3) | Si4 | O10              | 1.61(2) |
|     |                  |         | Si4 | O9               | 1.58(4) |
| Si1 | O2               | 1.65(2) | Si4 | O11              | 1.69(5) |
| Si1 | O6 <sup>5</sup>  | 1.60(3) | Si4 | O8               | 1.55(3) |
| Si1 | O1               | 1.60(2) |     |                  |         |

<sup>1</sup>+X,1+Y,+Z; <sup>2</sup>+X,1+Y,-1+Z; <sup>3</sup>1-X,1/2+Y,1/2-Z; <sup>4</sup>1-X,1/2+Y,-1/2-Z; <sup>5</sup>+X,+Y,-1+Z; <sup>6</sup>1-X,-1/2+Y,1/2-Z; <sup>7</sup>+X,-1+Y,1+Z.

**Table S8.** Selected interatomic distances for L3.

| Atom | Atom            | Length/Å  | Atom | Atom            | Length/Å  |
|------|-----------------|-----------|------|-----------------|-----------|
| Ti1  | O5 <sup>3</sup> | 2.007(9)  | Si1  | O1              | 1.619(11) |
| Ti1  | O5 <sup>4</sup> | 2.123(9)  | Si1  | O2              | 1.574(11) |
| Ti1  | O4              | 1.828(9)  | Si1  | O2 <sup>5</sup> | 1.613(11) |
| Ti1  | O7 <sup>1</sup> | 2.038(10) |      |                 |           |
| Ti1  | O7              | 1.956(10) | Si2  | O5              | 1.634(9)  |
| Ti1  | O3              | 1.814(10) | Si2  | O4              | 1.607(9)  |
|      |                 |           | Si2  | O6 <sup>5</sup> | 1.603(9)  |
| Si1  | O3              | 1.586(10) | Si2  | O6              | 1.608(9)  |

<sup>1</sup>+X,3/2-Y,-1/2+Z; <sup>2</sup>+X,3/2-Y,1/2+Z; <sup>3</sup>1-X,1-Y,1-Z; <sup>4</sup>1-X,1/2+Y,3/2-Z; <sup>5</sup>+X,1/2-Y,1/2+Z.

**Table S9.** Anisotropic Displacement Parameters (Å<sup>2</sup>×10<sup>3</sup>) for lintisite sample. The Anisotropic displacement factor exponent takes the form: -2π<sup>2</sup>[h<sup>2</sup>a<sup>2</sup>U<sub>11</sub>+2hka\*b\*U<sub>12</sub>+...].

| Atom | U <sup>11</sup> | U <sup>22</sup> | U <sup>33</sup> | U <sup>23</sup> | U <sup>13</sup> | U <sup>12</sup> |
|------|-----------------|-----------------|-----------------|-----------------|-----------------|-----------------|
| Ti1  | 8.41(16)        | 5.06(16)        | 5.23(16)        | 0.04(10)        | 0.09(11)        | -0.21(10)       |
| Si2  | 9.3(2)          | 5.8(2)          | 5.2(2)          | -0.12(17)       | 0.10(18)        | 0.62(16)        |
| Si1  | 10.0(2)         | 7.5(2)          | 6.7(2)          | 0.18(17)        | -0.46(18)       | -0.44(16)       |
| Na1  | 22.9(4)         | 13.0(4)         | 14.2(4)         | -1.0(3)         | 5.5(3)          | 0.7(3)          |
| Na2  | 28.2(7)         | 29.5(8)         | 23.4(7)         | 0               | -4.4(6)         | 0               |
| O6   | 8.0(6)          | 8.4(6)          | 8.4(6)          | 0.7(5)          | -1.0(5)         | 0.0(4)          |
| O7   | 11.9(6)         | 8.9(6)          | 7.6(6)          | -0.6(5)         | 0.0(5)          | -1.0(5)         |
| O5   | 14.5(6)         | 8.0(6)          | 8.7(6)          | -0.5(5)         | -0.4(5)         | 2.1(5)          |
| O4   | 11.0(6)         | 9.5(6)          | 7.5(6)          | -2.4(5)         | 0.0(5)          | 0.3(4)          |
| O3   | 14.2(6)         | 9.4(6)          | 10.1(6)         | -0.5(5)         | -0.7(5)         | -2.7(5)         |
| O2   | 14.9(7)         | 12.6(7)         | 9.7(7)          | 2.9(5)          | -0.9(5)         | -1.2(5)         |
| O1   | 11.4(6)         | 15.9(7)         | 13.6(7)         | -1.2(6)         | -0.3(5)         | 0.9(5)          |
| O8   | 17.6(9)         | 41.4(12)        | 27.9(10)        | 2.9(9)          | -0.7(7)         | -0.4(7)         |
| Li1  | 18(2)           | 24(3)           | 12(2)           | 0               | -0.6(19)        | 0               |

**Table S10.** Anisotropic Displacement Parameters ( $\text{\AA}^2 \times 10^3$ ) for kukisvumite sample. The Anisotropic displacement factor exponent takes the form:  $-2\pi^2[h^2a^2U_{11}+2hka^*b^*U_{12}+\dots]$ .

| Atom | $U^{11}$ | $U^{22}$ | $U^{33}$ | $U^{23}$ | $U^{13}$  | $U^{12}$ |
|------|----------|----------|----------|----------|-----------|----------|
| Ti1  | 7.8(2)   | 4.7(2)   | 5.9(2)   | 0.26(15) | -0.36(16) | 0.03(15) |
| Zn1  | 11.8(4)  | 13.5(4)  | 17.0(5)  | 0        | 0         | 0.0(3)   |
| Si2  | 8.5(3)   | 5.9(3)   | 7.9(3)   | 0.3(2)   | 0.4(3)    | 0.3(2)   |
| Si1  | 7.5(3)   | 5.0(3)   | 5.2(3)   | 0.2(2)   | -0.6(2)   | -0.7(2)  |
| Na2  | 22.2(6)  | 11.9(6)  | 15.0(6)  | -0.2(5)  | -6.2(5)   | -1.6(5)  |
| O8   | 10.4(9)  | 7.6(8)   | 8.6(9)   | -1.6(7)  | -0.4(7)   | 1.4(7)   |
| O1   | 7.0(8)   | 8.8(8)   | 7.7(9)   | 0.9(7)   | -1.1(7)   | 0.0(6)   |
| O3   | 13.5(9)  | 7.5(8)   | 9.3(9)   | 0.2(7)   | 0.6(8)    | -3.1(7)  |
| O4   | 12.5(9)  | 8.5(9)   | 12.2(10) | -1.2(7)  | -0.3(8)   | 3.6(7)   |
| O2   | 9.7(8)   | 9.3(8)   | 6.7(9)   | -1.8(7)  | -0.4(7)   | 0.4(7)   |
| O6   | 26.0(11) | 13.1(10) | 12.8(11) | 4.9(8)   | 1.5(9)    | -0.1(8)  |
| O5   | 8.3(10)  | 13.6(11) | 74(2)    | 2.5(13)  | 2.3(12)   | -1.1(8)  |
| Na1  | 28.0(17) | 44(2)    | 19.7(17) | 0.3(14)  | 6.2(14)   | -1.9(15) |
| O7B  | 18(2)    | 35(3)    | 26(3)    | -8(2)    | 3(2)      | 0(2)     |
| O7A  | 18(2)    | 38(3)    | 27(3)    | 11(2)    | -1(2)     | -2(2)    |

**Table S11.** Anisotropic Displacement Parameters ( $\text{\AA}^2 \times 10^3$ ) for K3 sample. The Anisotropic displacement factor exponent takes the form:  $-2\pi^2[h^2a^2U_{11}+2hka^*b^*U_{12}+\dots]$ .

| Atom | $U^{11}$ | $U^{22}$ | $U^{33}$ | $U^{23}$ | $U^{13}$ | $U^{12}$ |
|------|----------|----------|----------|----------|----------|----------|
| Ti1  | 26(5)    | 11(4)    | 12(5)    | -1(2)    | 1(2)     | 1.2(19)  |
| Ti2  | 35(5)    | 9(4)     | 5(4)     | 7(2)     | -1(2)    | 1(2)     |
| Si2  | 26(5)    | 10(5)    | 13(5)    | 3(3)     | 0(3)     | 3(3)     |
| Si1  | 22(5)    | 13(5)    | 6(5)     | 4(3)     | 0(3)     | -2(3)    |
| Si4  | 31(6)    | 24(6)    | 10(5)    | 1(4)     | 0(4)     | 2(3)     |
| Si3  | 35(6)    | 18(6)    | 4(5)     | 0(4)     | -4(3)    | -3(3)    |
| O4   | 27(8)    | 21(8)    | 22(9)    | 0(6)     | 1(6)     | -1(6)    |
| O13  | 20(5)    | 20(5)    | 20(5)    | 0.1(9)   | -0.1(9)  | 0.1(9)   |
| O10  | 20(5)    | 20(5)    | 20(5)    | 0.1(9)   | -0.1(9)  | 0.1(9)   |
| O2   | 14(6)    | 12(7)    | 9(7)     | 0(4)     | 1(4)     | -1(4)    |
| O6   | 17(8)    | 14(8)    | 13(8)    | 2(6)     | -2(5)    | 1(5)     |
| O1   | 20(7)    | 10(8)    | 10(8)    | -2(6)    | -2(5)    | -3(5)    |
| O9   | 64(12)   | 62(12)   | 63(12)   | 1(7)     | 0(6)     | 1(6)     |
| O5   | 34(9)    | 33(9)    | 29(9)    | 1(6)     | 0(6)     | 1(6)     |
| O7   | 22(8)    | 19(8)    | 18(8)    | -2(6)    | -2(6)    | -4(5)    |
| O3   | 26(8)    | 23(8)    | 21(9)    | 2(6)     | -7(6)    | 1(5)     |
| O12  | 30(8)    | 27(9)    | 27(9)    | 0(6)     | -2(6)    | -2(6)    |
| O11  | 79(15)   | 79(16)   | 78(16)   | 0(7)     | 1(7)     | 1(6)     |
| O8   | 41(10)   | 35(10)   | 31(10)   | 0(6)     | 0(6)     | -2(6)    |
| O14  | 61(12)   | 61(12)   | 61(12)   | -0.2(14) | -0.1(14) | 0.0(14)  |

**Table S12.** Anisotropic Displacement Parameters ( $\text{\AA}^2 \times 10^3$ ) for L3 sample. The Anisotropic displacement factor exponent takes the form:  $-2\pi^2[h^2a^{*2}U_{11}+2hka^*b^*U_{12}+\dots]$ .

| Atom | $U^{11}$ | $U^{22}$ | $U^{33}$ | $U^{23}$ | $U^{13}$ | $U^{12}$ |
|------|----------|----------|----------|----------|----------|----------|
| Ti1  | 37.7(17) | 12.0(16) | 10.5(16) | 0.0(7)   | 7.4(11)  | -0.7(7)  |
| Si2  | 40(2)    | 12(2)    | 5.4(18)  | -0.4(12) | 8.0(14)  | 1.2(12)  |
| Si1  | 46(3)    | 15(2)    | 15(2)    | -2.3(12) | 8.9(18)  | -2.9(13) |
| O5   | 36(4)    | 13(4)    | 7(3)     | -2(3)    | 6(3)     | -1(3)    |
| O4   | 45(5)    | 10(4)    | 11(4)    | -2(3)    | 11(4)    | 2(3)     |
| O7   | 40(5)    | 24(5)    | 13(4)    | -1(4)    | 7(4)     | 1(4)     |
| O6   | 36(4)    | 13(4)    | 12(4)    | 1(3)     | 5(3)     | 2(3)     |
| O3   | 41(5)    | 23(5)    | 33(6)    | -6(4)    | 10(4)    | -7(4)    |
| O1   | 55(7)    | 28(7)    | 42(8)    | 8(6)     | 14(6)    | -1(5)    |
| O2   | 87(9)    | 42(7)    | 26(6)    | -14(5)   | 19(6)    | -7(6)    |

**Table S13.** X-ray Rietveld refinement of the  $\text{Ti}(\text{Si}_2\text{O}_5(\text{OH}))(\text{OH})$  structure.

| Chemical formula                                     | $\text{Ti}(\text{Si}_2\text{O}_5(\text{OH}))(\text{OH})$ |
|------------------------------------------------------|----------------------------------------------------------|
| $M_r$                                                | 432.09                                                   |
| Temperature ( $^\circ\text{C}$ )                     | 23(2)                                                    |
| Crystal system,<br>space group                       | Monoclinic, $P2_1/c$                                     |
| $a, b, c$ ( $\text{\AA}$ )                           | 11.92376(45),<br>8.72691(57),<br>5.20727(37)             |
| $\beta$ ( $^\circ$ )                                 | 100.8989(94)                                             |
| $V$ ( $\text{\AA}^3$ )                               | 532.08(11)                                               |
| $Z$                                                  | 12                                                       |
| $D_x$ ( $\text{Mg m}^{-3}$ )                         | 2.70                                                     |
| Radiation type                                       | Cu $K\alpha$                                             |
| Data collection                                      |                                                          |
| Diffractometer                                       | Rigaku SmartLab SE                                       |
| $\theta$ -range                                      | 1.5–120,                                                 |
| $(\sin \theta/\lambda)_{\max}$ ( $\text{\AA}^{-1}$ ) | Step size ( $^\circ$ ) 0.02<br>0.562                     |
| Refinement                                           |                                                          |
|                                                      | $R_{\text{wp}}$ 0.064                                    |
|                                                      | $R_p$ 0.066                                              |
|                                                      | $R_{\text{Bragg}}$ 0.079                                 |
| $S$                                                  | 1.0                                                      |
| No. of parameters                                    | 53                                                       |

**Table S14.**  $\text{Li}^+$ ,  $\text{Zn}^{2+}$ ,  $\text{Na}^+$ -ionic conductivities in lintisite, kukisvumite and AM-4 from KMC modeling, respectively.

| Structure   | $\sigma$ (S/cm) at<br>300 K | $\sigma$ (S/cm) at<br>400 K | $\sigma$ (S/cm) at<br>500 K | $\sigma$ (S/cm) at<br>600 K | $\sigma$ (S/cm) at<br>700 K | $\sigma$ (S/cm) at<br>800 K |
|-------------|-----------------------------|-----------------------------|-----------------------------|-----------------------------|-----------------------------|-----------------------------|
| Lintisite   | $6.16 \times 10^{-7}$       | $8.28 \times 10^{-7}$       | $3.09 \times 10^{-5}$       | $1.02 \times 10^{-4}$       | $1.40 \times 10^{-4}$       | $3.61 \times 10^{-4}$       |
| Kukisvumite | $2.20 \times 10^{-4}$       | $1.09 \times 10^{-3}$       | $1.66 \times 10^{-2}$       | $1.94 \times 10^{-1}$       | $6.99 \times 10^{-1}$       | $2.51 \times 10^0$          |
| AM-4        | $1.36 \times 10^{-7}$       | $2.13 \times 10^{-6}$       | $6.75 \times 10^{-6}$       | $1.73 \times 10^{-5}$       | $4.70 \times 10^{-5}$       | $6.28 \times 10^{-4}$       |

**Table 15.** H<sup>+</sup>-ionic conductivities in lintisite, kukisvumite and AM-4 from KMC modeling, respectively.

| Structure   | $\sigma$ (S/cm)<br>at 300 K | $\sigma$ (S/cm)<br>at 400 K | $\sigma$ (S/cm)<br>at 500 K | $\sigma$ (S/cm)<br>at 600 K | $\sigma$ (S/cm)<br>at 700 K | $\sigma$ (S/cm)<br>at 800 K |
|-------------|-----------------------------|-----------------------------|-----------------------------|-----------------------------|-----------------------------|-----------------------------|
| Lintisite   | $3.34 \times 10^{-5}$       | $2.92 \times 10^{-4}$       | $8.24 \times 10^{-3}$       | $1.22 \times 10^{-2}$       | $2.53 \times 10^{-2}$       | $5.02 \times 10^{-2}$       |
| Kukisvumite | $1.75 \times 10^{-5}$       | $2.49 \times 10^{-5}$       | $2.53 \times 10^{-2}$       | $3.18 \times 10^{-1}$       | $4.21 \times 10^{-1}$       | $3.37 \times 10^{-1}$       |
| AM-4        | $9.15 \times 10^{-2}$       | $3.08 \times 10^{-1}$       | $2.25 \times 10^0$          | $8.84 \times 10^0$          | $1.46 \times 10^0$          | $2.28 \times 10^0$          |

**Table S16.** Parameters obtained by the VASP optimization for model structure AM-4 and its derivatives after exchange Na-Li.

| Parameters                          |                           | Model AM-4                                                      |                    | Model AM-4-I                                                                    |                    | model AM-4-II                                                                   |                    |
|-------------------------------------|---------------------------|-----------------------------------------------------------------|--------------------|---------------------------------------------------------------------------------|--------------------|---------------------------------------------------------------------------------|--------------------|
|                                     |                           | Na <sub>6</sub> Ti <sub>4</sub> Si <sub>8</sub> O <sub>28</sub> |                    | Li <sub>2</sub> Na <sub>4</sub> Ti <sub>4</sub> Si <sub>8</sub> O <sub>28</sub> |                    | Li <sub>4</sub> Na <sub>2</sub> Ti <sub>4</sub> Si <sub>8</sub> O <sub>28</sub> |                    |
|                                     |                           | Initial                                                         | After optimisation | Initial                                                                         | After optimisation | Initial                                                                         | After optimisation |
| Parameters of<br>elementary cell    | <i>a</i> , Å              | 15.26                                                           | 15.69              | 15.69                                                                           | 15.08              | 15.69                                                                           | 15.30              |
|                                     | <i>b</i> , Å              | 15.26                                                           | 15.69              | 15.69                                                                           | 15.08              | 15.69                                                                           | 15.30              |
|                                     | <i>c</i> , Å              | 5.20                                                            | 5.31               | 5.31                                                                            | 5.31               | 5.31                                                                            | 5.19               |
|                                     | $\alpha$                  | 89.29                                                           | 88.61              | 88.61                                                                           | 91.95              | 88.61                                                                           | 86.07              |
|                                     | $\beta$                   | 89.29                                                           | 88.61              | 88.61                                                                           | 91.95              | 88.61                                                                           | 86.07              |
|                                     | $\gamma$                  | 32.62                                                           | 32.41              | 32.41                                                                           | 33.79              | 32.41                                                                           | 32.88              |
|                                     | <i>V</i> , Å <sup>3</sup> | 653.22                                                          | 700.77             | 700.77                                                                          | 671.44             | 700.77                                                                          | 658.64             |
| Energy after<br>optimisation,<br>eV |                           | -339.54 eV                                                      |                    | -342.19 eV                                                                      |                    | -343.18 eV                                                                      |                    |
